# Supplementary material
Source: Springer Nature journal article supplement (https://www.springermedizin.de/resource/supplementary/12992_2012_187_MOESM7_ESM.pdf/9616772)
Supplement: MOESM7 [file 9616772]

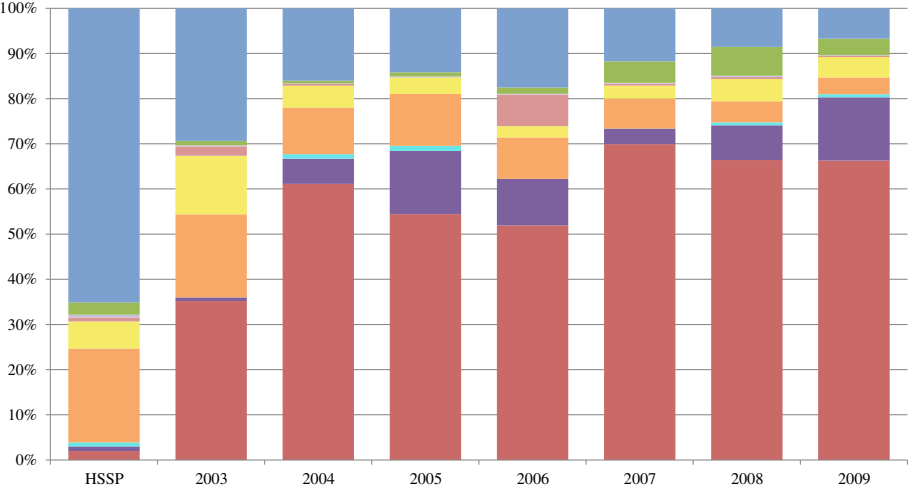

STIs, HIV/AIDS

Malaria

Tuberculosis

Essential Clinical Care, IMCI & Mental Health

Sexual and Reproductive Health

Nutrition

Health Education & School Health

Public Health Interventions

Support Systems
